# Supplementary material
Source: publisher site journal article supplement (https://www.dovepress.com/article/378486)
Supplement: Supplementary file 1 [file get_supplementary_file.php]

**SUPPLEMENTARY TABLES**

**Table S.1**

Baseline characteristics of the study cohort of 29779 initiators of single-inhaler dual bronchodilator therapy and 4122 initiators of single-inhaler triple therapy, crude, before weighting by propensity scores, with corresponding standardized mean differences.

|  | **Single-inhaler dual bronchodilator** | **Single-inhaler triple therapy** | | **Standardized mean difference** |
| --- | --- | --- | --- | --- |
| **Number of patients** | 29779 | 4122 | |  |
| **Age at cohort entry, mean (sd)** | 70.0 (10.5) | 70.6 (11.1) | | 0.0540 |
| **Female sex, n (%)** | 13395 (45.0) | 1912 (46.4) | | 0.0282 |
| **Current smoker, n (%)** | 16231 (54.5) | 2227 (54.0) | | -0.0096 |
| **Obesity Status, n (%)** |  |  | |  |
| Obese | 8580 (28.8) | 1128 (27.4) | | -0.0322 |
| Non-Obese | 19483 (65.4) | 2652 (64.3) | | -0.0228 |
| Missing data | 1716 (5.8) | 342 (8.3) | | 0.0993 |
| **Alcohol Abuse, n (%)** | 828 (2.8) | 114 (2.8) | | -0.0009 |
| **Blood eosinophils cells/µL*, mean (sd)** | 225.5 (176.4) | 248.1 (205.8) | | 0.1255 |
| **Blood eosinophil count %*, mean (sd)** | 3.0 (2.1) | 3.2 (2.4) | | 0.1171 |
| **FEV1 (% predicted)**, mean (sd)** | 60.6 (17.8) | 54.5 (18.7) | | -0.3402 |
| **FEV1/FVC** †**, mean (sd)** | 60.8 (13.4) | 59.4 (15.0) | | -0.1030 |
| **Severity of dyspnea** |  |  | |  |
| None-Mild | 11026 (37.0) | 1003 (24.3) | | -0.2779 |
| Moderate-Severe | 14216 (47.7) | 2148 (52.1) | | 0.0875 |
| Missing | 4537 (15.2) | 971 (23.6) | | 0.2116 |
| **Respiratory events and medications in year prior to cohort entry, n (%)** |  |  | |  |
| Hospitalization for COPD | 1976 (6.6) | 625 (17.6) | | 0.3405 |
| Moderate/severe COPD exacerbation |  |  | |  |
| None | 18815 (63.2) | 1756 (42.6) | | -0.4214 |
| One | 6731 (22.6) | 1224 (29.7) | | 0.1619 |
| Two | 2315 (7.8) | 577 (14.0) | | 0.2008 |
| Three or more | 1918 (6.4) | 565 (13.7) | | 0.2432 |
| Asthma diagnosis | 2072 (7.0) | 564 (13.7) | | 0.2224 |
| Pneumonia hospitalization | 1867 (6.3) | 524 (12.7) | | 0.2212 |
| LAMA or LABA (no ICS)‡ |  |  | |  |
| None | 12340 (41.4) | 1812 (44.0) | |  |
| Any or both | 17439 (58.6) | 2310 (56.0) | |  |
| Short-acting beta-agonists | 23975 (80.5) | 3384 (82.1) | | 0.0407 |
| Short-acting anti muscarinic | 629 (2.1) | 134 (3.3) | | 0.0705 |
| Prednisolone | 9910 (33.3) | 2034 (49.3) | | 0.3307 |
| Methylxanthines | 77 (0.3) | 56 (1.4) | | 0.1231 |
| Respiratory antibiotics | 17434 (58.5) | 2936 (71.2) | | 0.2681 |
|  |  |  | |  |
| **Comorbidity in year prior to cohort entry, n (%)** | |  | |  |
| Cancer | 2135 (7.2) | 384 (9.3) | | 0.0781 |
| Heart failure | 2973 (10.0) | 635 (15.4) | | 0.1634 |
| Myocardial infarction (hospitalized) | 286 (1.0) | 54 (1.3) | | 0.0330 |
| Stroke (hospitalized) | 681 (2.3) | 161 (3.9) | | 0.0936 |
| Renal disease | 2156 (7.2) | 374 (9.1) | | 0.0670 |
| Diabetes | 7514 (25.2) | 1161 (28.2) | | 0.0663 |
|  |  |  | |  |
| **Other medication use in year prior to cohort entry, n (%)** | |  | |  |
| ACE-inhibitors | 7901 (26.5) | 1066 (25.9) | | -0.0153 |
| ARBs | 3311 (11.1) | 444 (10.8) | | -0.0111 |
| Beta-blockers | 7775 (26.1) | 1181 (28.7) | | 0.0570 |
| Calcium-channel blockers | 8221 (27.6) | 1096 (26.6) | | -0.0229 |
| Thiazide diuretics | 2772 (9.3) | 344 (8.3) | | -0.0340 |
| Antiarrhythmics | 555 (1.9) | 83 (2.0) | | 0.0109 |
| Aspirin | 6208 (20.8) | 871 (21.1) | | 0.0070 |
| Oral anticoagulant | 3897 (13.1) | 596 (14.5) | | 0.0398 |
| Statins | 15012 (50.4) | 2017 (48.9) | | -0.0296 |
| PPIs | 14000 (47.0) | 2017 (48.9) | | 0.0384 |
| NSAIDs | 3230 (10.8) | 365 (8.9) | | -0.0669 |
| Opioids | 10957 (36.8) | 1683 (40.8) | | 0.0829 |
|  |  |  |  | |

* Based on available data from 86% for EOS count (cells/uL) and 86% for EOS count (%)

** Based on available data from 63% of subjects

† Based on available data from 45% of subjects

‡ Stratification factor, not weighted. Propensity scores computed separately for each stratum

**Table S.2**

Baseline characteristics of the study sub-cohort with no LAMA or LABA (no ICS) use prior to treatment initiation (12340 initiators of single-inhaler dual bronchodilator therapy and 1799 initiators of single-inhaler triple therapy), after fine stratification weighting from probability of treatment propensity scores, with corresponding standardized mean differences.

|  | **Single-inhaler dual bronchodilator** | **Single-inhaler triple therapy** | | **Standardized mean difference** |
| --- | --- | --- | --- | --- |
| **Number of patients** | 12340 | 1799 | | . |
| **Age at cohort entry, mean (sd)** | 69.5 (10.9) | 69.4 (11.4) | | -0.0082 |
| **Female sex, n (%)** | 5454 (44.2) | 783 (43.5) | | -0.0136 |
| **Current smoker, n (%)** | 7111 (57.6) | 1003 (55.7) | | -0.0382 |
| **Obesity Status, n (%)** |  |  | | . |
| Obese | 3273 (26.5) | 483 (26.9) | | 0.0076 |
| Non-Obese | 7930 (64.3) | 1143 (63.5) | | -0.0153 |
| Missing data | 1137 (9.2) | 173 (9.6) | | 0.0136 |
| **Alcohol Abuse, n (%)** | 367 (3.0) | 57 (3.2) | | 0.0109 |
| **Blood eosinophils cells/µL*, mean (sd)** | 224.4 (182.6) | 231.0 (173.1) | | 0.0364 |
| **Blood eosinophil count %*, mean (sd)** | 2.9 (2.1) | 3.1 (2.3) | | 0.0858 |
| **FEV1 (% predicted)**, mean (sd)** | 59.6 (18.3) | 59.6 (19.0) | | -0.0008 |
| **FEV1/FVC** †**, mean (sd)** | 60.5 (13.3) | 62.5 (14.1) | | 0.1493 |
| **Severity of dyspnea** |  |  | |  |
| None-Mild | 3882 (31.5) | 596 (33.1) | | 0.0352 |
| Moderate-Severe | 5111 (41.4) | 729 (40.5) | | -0.0185 |
| Missing | 3347 (27.1) | 475 (26.4) | | -0.0166 |
| **Respiratory events and medications in year prior to cohort entry, n (%)** |  |  | |  |
| Hospitalization for COPD | 1203 (9.8) | 181 (10.1) | | 0.0107 |
| Moderate/severe COPD exacerbation |  |  | |  |
| None | 8217 (66.6) | 1192 (66.3) | | -0.0069 |
| One | 2802 (22.7) | 411 (22.8) | | 0.0034 |
| Two | 757 (6.1) | 110 (6.1) | | 0.0000 |
| Three or more | 565 (4.6) | 86 (4.8) | | 0.0088 |
| Asthma diagnosis | 854 (6.9) | 131 (7.3) | | 0.0148 |
| Pneumonia hospitalization | 1258 (10.2) | 202 (11.2) | | 0.0338 |
| Short-acting beta-agonists | 8838 (71.6) | 1299 (72.2) | | 0.0130 |
| Short-acting anti muscarinic | 388 (3.1) | 58 (3.2) | | 0.0043 |
| Prednisolone | 3367 (27.3) | 491 (27.3) | | 0.0007 |
| Methylxanthines | 33 (0.3) | 5 (0.3) | | 0.0062 |
| Respiratory antibiotics | 7097 (57.5) | 1032 (57.4) | | -0.0027 |
|  |  |  | |  |
| **Comorbidity in year prior to cohort entry, n (%)** | |  | |  |
| Cancer | 1061 (8.6) | 164 (9.1) | | 0.0175 |
| Heart failure | 1516 (12.3) | 222 (12.3) | | 0.0012 |
| Myocardial infarction (hospitalized) | 141 (1.1) | 19 (1.0) | | -0.0099 |
| Stroke (hospitalized) | 380 (3.1) | 65 (3.6) | | 0.0292 |
| Renal disease | 937 (7.6) | 136 (7.6) | | -0.0016 |
| Diabetes | 3128 (25.4) | 455 (25.3) | | -0.0019 |
|  |  |  | |  |
| **Other medication use in year prior to cohort entry, n (%)** | |  | |  |
| ACE-inhibitors | 3169 (25.7) | 486 (27.0) | | 0.0299 |
| ARBs | 1278 (10.4) | 195 (10.9) | | 0.0166 |
| Beta-blockers | 3294 (26.7) | 469 (26.1) | | -0.0142 |
| Calcium-channel blockers | 3317 (26.9) | 469 (26.1) | | -0.0185 |
| Thiazide diuretics | 1062 (8.6) | 148 (8.2) | | -0.0144 |
| Antiarrhythmics | 217 (1.8) | 37 (2.1) | | 0.0223 |
| Aspirin | 2442 (19.8) | 350 (19.4) | | -0.0088 |
| Oral anticoagulant | 1639 (13.3) | 245 (13.6) | | 0.0096 |
| Statins | 5762 (46.7) | 842 (46.8) | | 0.0021 |
| PPIs | 5507 (44.6) | 802 (44.6) | | -0.0011 |
| NSAIDs | 1277 (10.3) | 178 (9.9) | | -0.0152 |
| Opioids | 4486 (36.3) | 644 (35.8) | | -0.0110 |
|  |  |  |  | |

* Based on available data from 84% for EOS count (cells/uL) and 84% for EOS count (%)

** Based on available data from 56% of subjects

† Based on available data from 42% of subjects

**Table S.3**

Baseline characteristics of the study sub-cohort of subjects who received a LAMA or LABA (no ICS) prior to treatment initiation (17362 initiators of single-inhaler dual bronchodilator therapy and 2307 initiators of single-inhaler triple therapy), after fine stratification weighting from probability of treatment propensity scores, with corresponding standardized mean differences.

|  | **Single-inhaler dual bronchodilator** | **Single-inhaler triple therapy** | | **Standardized mean difference** |
| --- | --- | --- | --- | --- |
| **Number of patients** | 17362 | 2307 | | . |
| **Age at cohort entry, mean (sd)** | 70.5 (10.3) | 70.8 (10.4) | | 0.0200 |
| **Female sex, n (%)** | 7945 (45.8) | 1025 (44.4) | | -0.0269 |
| **Current smoker, n (%)** | 9079 (52.3) | 1224 (53.0) | | 0.0152 |
| **Obesity Status, n (%)** |  |  | | . |
| Obese | 5226 (30.1) | 688 (29.8) | | -0.0063 |
| Non-Obese | 11466 (66.0) | 1531 (66.4) | | 0.0066 |
| Missing data | 669 (3.9) | 88 (3.8) | | -0.0011 |
| **Alcohol Abuse, n (%)** | 463 (2.7) | 68 (3.0) | | 0.0176 |
| **Blood eosinophils cells/µL*, mean (sd)** | 230.1 (176.6) | 234.4 (191.1) | | 0.0245 |
| **Blood eosinophil count %*, mean (sd)** | 3.1 (2.2) | 3.1 (2.3) | | 0.0202 |
| **FEV1 (% predicted)**, mean (sd)** | 60.2 (17.6) | 60.0 (18.3) | | -0.0151 |
| **FEV1/FVC** †**, mean (sd)** | 60.7 (13.7) | 60.6 (14.1) | | -0.0023 |
| **Severity of dyspnea** |  |  | |  |
| None-Mild | 6619 (38.1) | 875 (37.9) | | -0.0043 |
| Moderate-Severe | 9265 (53.4) | 1238 (53.7) | | 0.0061 |
| Missing | 1477 (8.5) | 194 (8.4) | | -0.0034 |
| **Respiratory events and medications in year prior to cohort entry, n (%)** |  |  | |  |
| Hospitalization for COPD | 1147 (6.6) | 158 (6.9) | | 0.0104 |
| Moderate/severe COPD exacerbation |  |  | |  |
| None | 9784 (56.4) | 1288 (55.8) | | -0.0103 |
| One | 4191 (24.1) | 568 (24.6) | | 0.0116 |
| Two | 1784 (10.3) | 241 (10.5) | | 0.0057 |
| Three or more | 1603 (9.2) | 209 (9.1) | | -0.0056 |
| Asthma diagnosis | 1452 (8.4) | 211 (9.2) | | 0.0285 |
| Pneumonia hospitalization | 825 (4.8) | 112 (4.8) | | 0.0039 |
| Short-acting beta-agonists | 15158 (87.3) | 2013 (87.2) | | -0.0018 |
| Short-acting anti muscarinic | 278 (1.6) | 36 (1.5) | | -0.0042 |
| Prednisolone | 7123 (41.0) | 956 (41.4) | | 0.0083 |
| Methylxanthines | 70 (0.4) | 10 (0.4) | | 0.0070 |
| Respiratory antibiotics | 10785 (62.1) | 1451 (62.9) | | 0.0161 |
|  |  |  | |  |
| **Comorbidity in year prior to cohort entry, n (%)** | |  | |  |
| Cancer | 1151 (6.6) | 143 (6.2) | | -0.0177 |
| Heart failure | 1646 (9.5) | 234 (10.1) | | 0.0224 |
| Myocardial infarction (hospitalized) | 155 (0.9) | 23 (1.0) | | 0.0102 |
| Stroke (hospitalized) | 358 (2.1) | 47 (2.0) | | -0.0008 |
| Renal disease | 1278 (7.4) | 166 (7.2) | | -0.0063 |
| Diabetes | 4474 (25.8) | 589 (25.5) | | -0.0055 |
|  |  |  | |  |
| **Other medication use in year prior to cohort entry, n (%)** | |  | |  |
| ACE-inhibitors | 4695 (27.0) | 641 (27.8) | | 0.0167 |
| ARBs | 2015 (11.6) | 273 (11.8) | | 0.0070 |
| Beta-blockers | 4571 (26.3) | 628 (27.2) | | 0.0205 |
| Calcium-channel blockers | 4834 (27.8) | 653 (28.3) | | 0.0099 |
| Thiazide diuretics | 1675 (9.6) | 238 (10.3) | | 0.0218 |
| Antiarrhythmics | 345 (2.0) | 45 (1.9) | | -0.0032 |
| Aspirin | 3771 (21.7) | 517 (22.4) | | 0.0168 |
| Oral anticoagulant | 2288 (13.2) | 336 (14.6) | | 0.0399 |
| Statins | 9162 (52.8) | 1256 (54.5) | | 0.0339 |
| PPIs | 8518 (49.1) | 1112 (48.2) | | -0.0171 |
| NSAIDs | 1856 (10.7) | 244 (10.6) | | -0.0029 |
| Opioids | 6603 (38.0) | 878 (38.1) | | 0.0009 |
|  |  |  |  | |

* Based on available data from 87% for EOS count (cells/uL) and 87% for EOS count (%)

** Based on available data from 69% of subjects

† Based on available data from 47% of subjects
